# Supplementary material for: High expression of N-myc (and STAT) interactor predicts poor prognosis and promotes tumor growth in human glioblastoma
Source: PubMed Central journal article supplement (PMC4467123; doi:10.18632/oncotarget.3208), 2014-12-30
Supplement: oncotarget-06-4901-s001.pdf [file oncotarget-06-4901-s001.pdf]

# High expression of N-myc (and STAT) interactor predicts poor prognosis and promotes tumor growth in human glioblastoma

## Supplementary Material

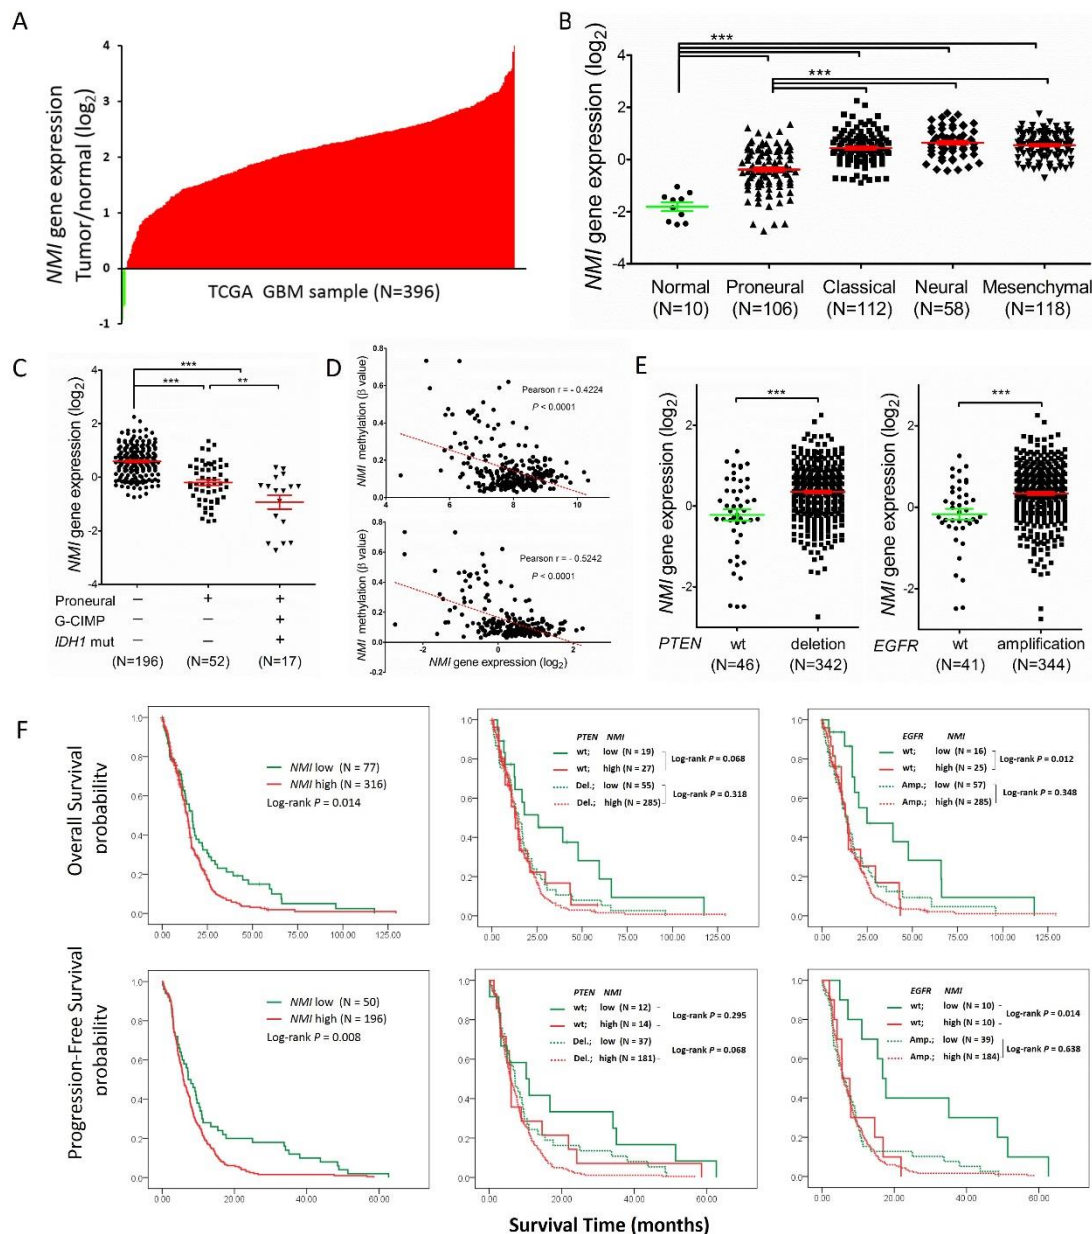

Supplementary Figure S1: *NMI* expression and prognostic significance in GBMs of the TCGA cohort. (A) *NMI* mRNA expression levels were detected in 396 GBM specimens and 10 cases of normal control tissue obtained by TCGA (the Agilent platform). The value represents  $\log_2$  of gene expression level of each GBM sample to the average mRNA of 10 normal samples. The red samples ( $>0$ ) indicate that the

mRNA levels of these GBM tissues were higher than the average of normal brain tissues while the green bars ( $<0$ ) represent GBM sample with lower *NMI* mRNA expression compared to normal tissues. (B) *NMI* mRNA expression levels were compared between normal samples and different molecular subtypes of GBMs as indicated (the Agilent platform). (C) *NMI* expression was compared according to subtype (proneural or not), Glioma-CpG Island Methylation Phenotype (G-CIMP) and *IDH1* mutation status (the Agilent platform). (D) The correlations of *NMI* methylation levels (presented as  $\beta$  values) and *NMI* expression for both platforms (upper panel, Affymetrix; lower panel, Agilent) were analyzed. (E) *NMI* expression was compared according to status of *PTEN* (left panel) or *EGFR* (right panel) mutation as indicated. Statistical differences were determined by two tailed student's t-test. \*,  $P<0.05$ ; \*\*,  $P<0.01$ ; \*\*\*,  $P<0.001$ ; ns, not significant. (F) Kaplan-Meier plots were estimated according to different *NMI* gene expression for overall survival (upper panels) and progression-free survival (lower panels) of all GBM patients (left panels), or considering the mutation status of *PTEN* (center panels) or *EGFR* (right panels) simultaneously, in the TCGA cohort (the Agilent platform). *P* values were obtained from log-rank test.

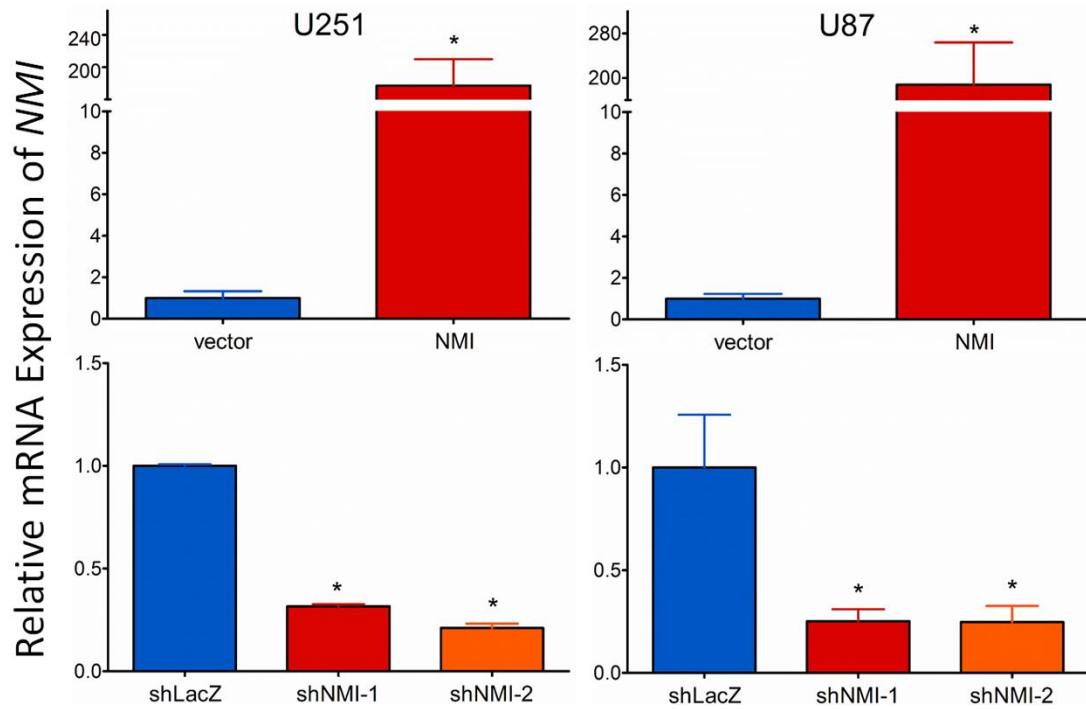

Supplementary Figure S2: Overexpression and knockdown of *NMI* were validated at mRNA level. *NMI* was overexpressed (upper panels) or knocked down (lower panels) by lentiviruses carrying corresponding expression vectors or shRNAs in U251 (left panels) or U87 (right panels) human glioma cell lines. RNA was extracted and subjected to real-time PCR assay. *GAPDH* was used as an internal control. Data are presented as mean  $\pm$  SEM. Statistical analysis was determined by two tailed student's t-test. \*,  $P < 0.05$ .

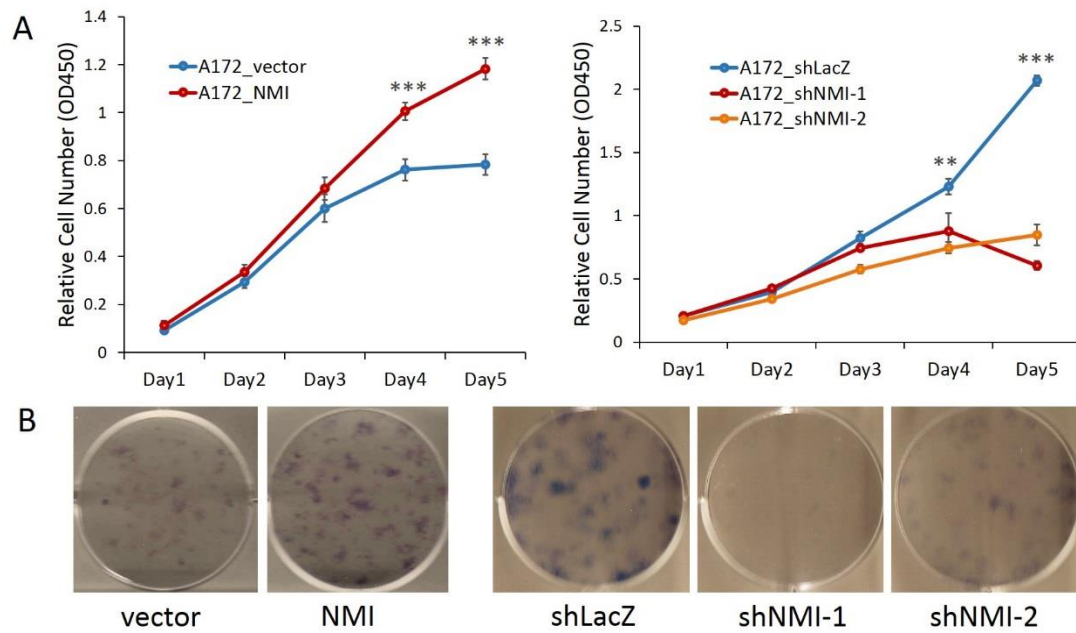

Supplementary Figure S3: NMI promoted A172 glioma cell growth. (A) The cell growth curve of NMI overexpressed (left panel) and silenced (right panel) A172 cells was determined by CCK-8 assay. (B) The long-term proliferation ability of NMI overexpression and knockdown cells was examined using clonogenic cell survival assay. Error bars represent the SEM of the mean value. Statistical analysis was determined by two tailed student's t-test. \*,  $P < 0.05$ ; \*\*,  $P < 0.01$ ; \*\*\*,  $P < 0.001$ .

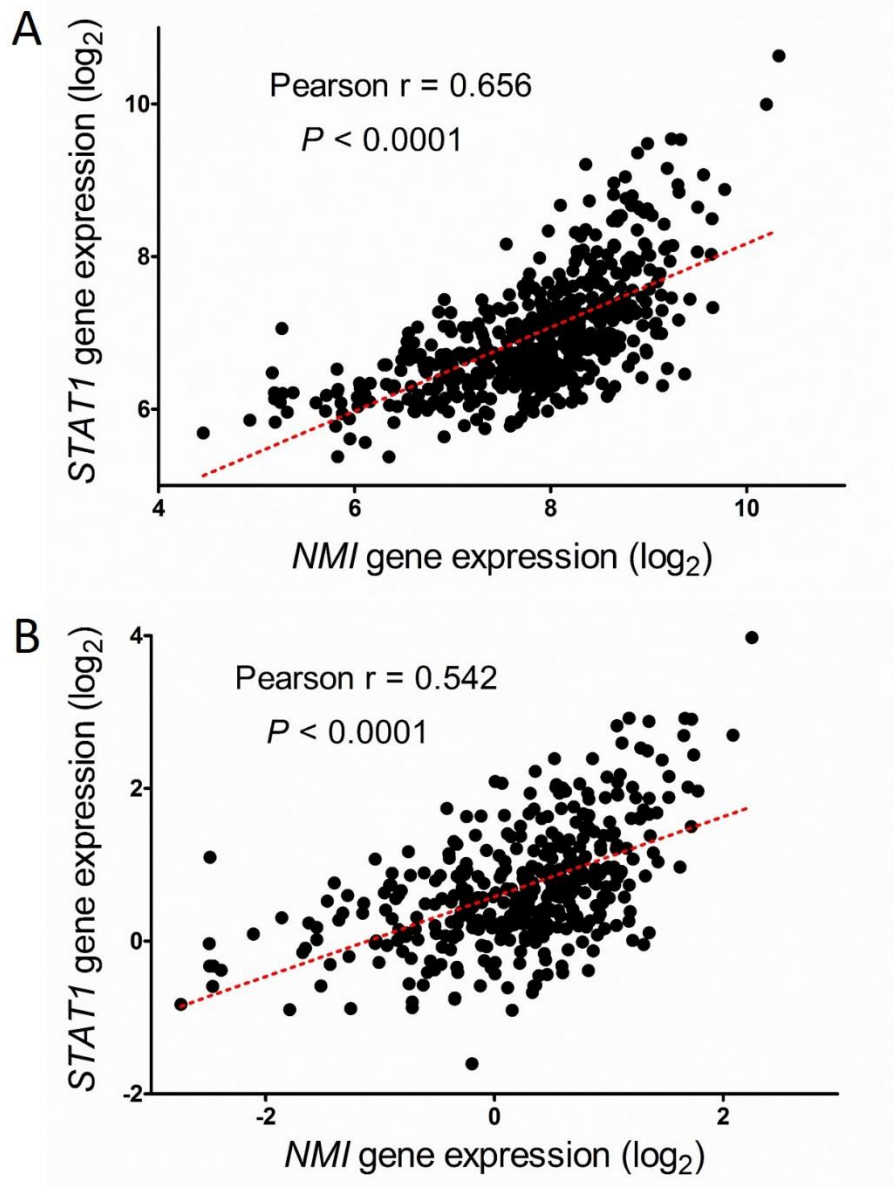

Supplementary Figure S4: The mRNA expression of *NMI* and *TCTN1* for each GBM patient of the TCGA cohort (A, the Affymetrix platform; B, the Agilent platform) was shown in scatter plots and the Pearson  $r$  and  $P$  value of the correlation were indicated. The dashed red line was fit by a linear regression.

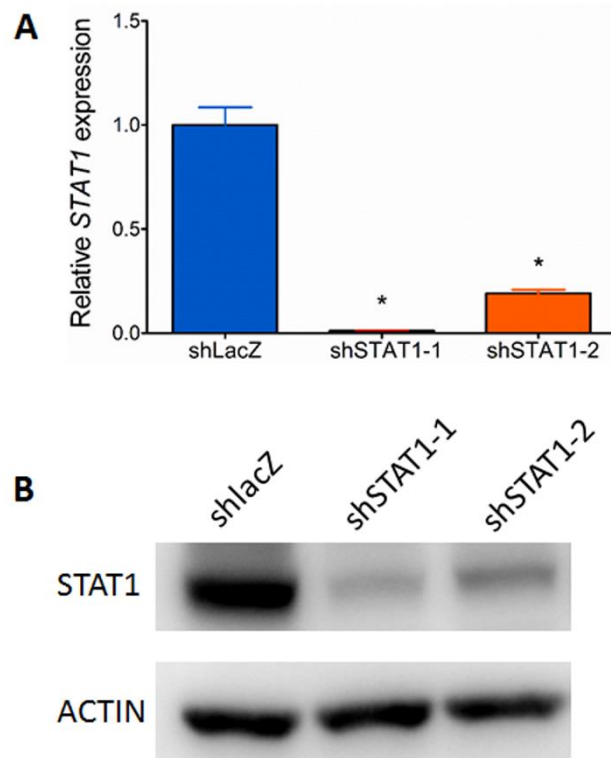

Supplementary Figure S5: Knockdown of *STAT1* was validated at mRNA and protein levels. *STAT1* was knocked down by lentiviruses carrying two independent shRNAs against it, and the efficiency was validated at mRNA level by real-time PCR (A) and protein level by Western blot assays (B). *GAPDH* was used as an internal control for real time PCR assays and *ACTIN* as a loading control for Western blot assays. Data are presented as mean  $\pm$  SEM. Statistical analysis was determined by two tailed student's t-test. \*,  $P < 0.05$ .

**Supplementary Table S1:** Comparison of *NMI* expression according to molecular features of GBM in the TCGA cohort of both platforms

| Molecular features |               | Affymetrix |                            |                | Agilent |                            |                |
|--------------------|---------------|------------|----------------------------|----------------|---------|----------------------------|----------------|
|                    |               | N          | mean $\pm$ SD ( $\log_2$ ) | <i>P</i>       | N       | mean $\pm$ SD ( $\log_2$ ) | <i>P</i>       |
| <i>G-CIMP</i>      | -             | 469        | 7.99 $\pm$ 0.78            | <b>4.55E-7</b> | 357     | 0.36 $\pm$ 0.67            | <b>9.66E-7</b> |
|                    | +             | 41         | 6.96 $\pm$ 1.09            |                | 29      | -0.73 $\pm$ 0.93           |                |
| <i>IDH1</i>        | wild type     | 372        | 8.04 $\pm$ 0.79            | <b>1.95E-4</b> | 259     | 0.42 $\pm$ 0.69            | <b>5.18E-5</b> |
|                    | mutation      | 30         | 7.07 $\pm$ 1.24            |                | 18      | -0.90 $\pm$ 1.04           |                |
| <i>PTEN</i>        | wild type     | 81         | 7.55 $\pm$ 1.04            | <b>0.001</b>   | 46      | -0.22 $\pm$ 0.97           | <b>3.36E-4</b> |
|                    | deletion      | 439        | 7.96 $\pm$ 0.81            |                | 342     | 0.35 $\pm$ 0.69            |                |
| <i>PDGFRA</i>      | wild type     | 405        | 7.96 $\pm$ 0.84            | <b>0.002</b>   | 296     | 0.35 $\pm$ 0.71            | <b>0.006</b>   |
|                    | amplification | 101        | 7.68 $\pm$ 0.85            |                | 78      | 0.09 $\pm$ 0.80            |                |
| <i>RBI</i>         | wild type     | 227        | 8.03 $\pm$ 0.78            | <b>0.009</b>   | 155     | 0.41 $\pm$ 0.74            | <b>0.041</b>   |
|                    | mutation      | 20         | 8.50 $\pm$ 0.55            |                | 11      | 0.88 $\pm$ 0.46            |                |
| <i>PARK2</i>       | wild type     | 369        | 7.86 $\pm$ 0.84            | <b>0.012</b>   | 267     | 0.26 $\pm$ 0.73            | 0.103          |
|                    | deletion      | 136        | 8.07 $\pm$ 0.87            |                | 107     | 0.40 $\pm$ 0.73            |                |
| <i>EGFR</i>        | wild type     | 70         | 7.60 $\pm$ 1.10            | <b>0.014</b>   | 41      | -0.17 $\pm$ 0.85           | <b>0.32E-4</b> |
|                    | amplification | 448        | 7.94 $\pm$ 0.81            |                | 344     | 0.34 $\pm$ 0.72            |                |
| <i>RBI</i>         | wild type     | 326        | 7.83 $\pm$ 0.87            | <b>0.016</b>   | 241     | 0.27 $\pm$ 0.73            | 0.640          |
|                    | deletion      | 193        | 8.02 $\pm$ 0.84            |                | 149     | 0.30 $\pm$ 0.79            |                |
| <i>CDK6</i>        | wild type     | 442        | 7.93 $\pm$ 0.84            | <b>0.017</b>   | 72      | 0.17 $\pm$ 0.83            | 0.158          |
|                    | amplification | 66         | 7.66 $\pm$ 0.90            |                | 318     | 0.31 $\pm$ 0.73            |                |
| <i>PIK3CA</i>      | wild type     | 221        | 8.04 $\pm$ 0.79            | <b>0.048</b>   | 151     | 0.44 $\pm$ 0.75            | 0.825          |
|                    | mutation      | 26         | 8.36 $\pm$ 0.58            |                | 15      | 0.48 $\pm$ 0.51            |                |
| <i>TP53</i>        | wild type     | 176        | 8.13 $\pm$ 0.76            | <b>0.049</b>   | 116     | 0.57 $\pm$ 0.68            | <b>4.67E-4</b> |
|                    | mutation      | 71         | 7.92 $\pm$ 0.81            |                | 50      | 0.14 $\pm$ 0.77            |                |
| <i>MGMT</i>        | unmethylated  | 177        | 8.08 $\pm$ 0.84            | 0.070          | 128     | 0.42 $\pm$ 0.78            | <b>0.017</b>   |
|                    | methylated    | 170        | 7.91 $\pm$ 0.89            |                | 125     | 0.19 $\pm$ 0.78            |                |

Abbreviations: G-CIMP, Glioma-CpG Island Methylator Phenotype.

**Supplementary Table S2:** Comparison of Overall survival (OS) and Progression-free survival (PFS) by Kaplan-Meier method according to different *NMI* expression stratified by molecular features of GBM in the TCGA cohort (the Affymetrix platform)

| Molecular features |               | OS                          |                      | PFS                         |                      |
|--------------------|---------------|-----------------------------|----------------------|-----------------------------|----------------------|
|                    |               | N<br>( <i>NMI</i> low/high) | log-rank<br><i>P</i> | N<br>( <i>NMI</i> low/high) | log-rank<br><i>P</i> |
| G-CIMP             | -             | 115/352                     | 0.273                | 75/226                      | 0.577                |
|                    | +             | 29/12                       | 0.352                | 21/5                        | 0.255                |
| <i>IDH1</i>        | wild type     | 87/284                      | 0.074                | 58/172                      | 0.154                |
|                    | mutation      | 18/11                       | 0.667                | 11/5                        | 0.506                |
| <i>PTEN</i>        | wild type     | 33/44                       | <b>1.90E-04</b>      | 21/25                       | <b>0.041</b>         |
|                    | deletion      | 109/324                     | 0.316                | 75/209                      | 0.125                |
| <i>PDGFRA</i>      | wild type     | 94/301                      | <b>0.002</b>         | 61/193                      | <b>0.004</b>         |
|                    | amplification | 41/60                       | 0.275                | 29/37                       | 0.637                |
| <i>RBI</i>         | wild type     | 49/170                      | 0.123                | 30/88                       | 0.535                |
|                    | mutation      | 1/18                        | 0.189                | 1/9                         | 0.636                |
| <i>PARK2</i>       | wild type     | 107/254                     | <b>0.001</b>         | 69/161                      | <b>0.013</b>         |
|                    | deletion      | 29/106                      | 0.531                | 22/67                       | 0.271                |
| <i>EGFR</i>        | wild type     | 27/39                       | <b>3.21E-04</b>      | 17/20                       | <b>0.001</b>         |
|                    | amplification | 113/329                     | 0.189                | 79/214                      | 0.481                |
| <i>RBI</i>         | wild type     | 92/231                      | <b>0.030</b>         | 58/149                      | 0.201                |
|                    | deletion      | 52/138                      | <b>0.004</b>         | 39/86                       | <b>0.005</b>         |
| <i>CDK6</i>        | wild type     | 34/71                       | <b>2.82E-04</b>      | 23/42                       | <b>0.001</b>         |
|                    | amplification | 110/298                     | 0.111                | 74/193                      | 0.354                |
| <i>PIK3CA</i>      | wild type     | 49/164                      | 0.375                | 30/28                       | 0.280                |
|                    | mutation      | 1/24                        | 0.401                | 1/15                        | 0.634                |
| <i>TP53</i>        | wild type     | 30/138                      | 0.999                | 20/72                       | 0.189                |
|                    | mutation      | 20/50                       | 0.178                | 11/25                       | 0.105                |
| <i>MGMT</i>        | unmethylated  | 35/141                      | 0.069                | 26/85                       | 0.443                |
|                    | methylated    | 51/118                      | 0.057                | 25/70                       | 0.223                |

Abbreviations: OS, overall survival; PFS, progression-free survival; G-CIMP, Glioma-CpG Island Methylator Phenotype.



**Supplementary Table S3:** Comparison of Overall survival (OS) and Progression-free survival (PFS) by Kaplan-Meier method according to different *NMI* expression stratified by molecular features of GBM in the TCGA cohort (the Agilent platform)

| Molecular features |               | OS                          |                      | PFS                         |                      |
|--------------------|---------------|-----------------------------|----------------------|-----------------------------|----------------------|
|                    |               | N<br>( <i>NMI</i> low/high) | log-rank<br><i>P</i> | N<br>( <i>NMI</i> low/high) | log-rank<br><i>P</i> |
| G-CIMP             | -             | 56/300                      | 0.460                | 37/187                      | 0.177                |
|                    | +             | 20/9                        | 0.822                | 13/4                        | 0.951                |
| <i>IDH1</i>        | wild type     | 37/221                      | 0.230                | 25/126                      | <b>0.042</b>         |
|                    | mutation      | 14/4                        | 0.907                | 7/1                         | 0.892                |
| <i>PTEN</i>        | wild type     | 19/27                       | 0.068                | 12/14                       | 0.295                |
|                    | deletion      | 55/285                      | 0.318                | 37/181                      | 0.068                |
| <i>PDGFRA</i>      | wild type     | 46/248                      | 0.142                | 28/160                      | <b>0.029</b>         |
|                    | amplification | 21/57                       | 0.241                | 15/31                       | 0.380                |
| <i>RB1</i>         | wild type     | 21/132                      | 0.506                | 12/69                       | 0.373                |
|                    | mutation      | 0/11                        | N.A.                 | 0/5                         | N.A.                 |
| <i>PARK2</i>       | wild type     | 52/214                      | <b>0.049</b>         | 32/133                      | <b>0.039</b>         |
|                    | deletion      | 17/89                       | 0.130                | 14/54                       | 0.085                |
| <i>EGFR</i>        | wild type     | 16/25                       | <b>0.012</b>         | 10/10                       | <b>0.014</b>         |
|                    | amplification | 57/285                      | 0.348                | 39/184                      | 0.638                |
| <i>RB1</i>         | wild type     | 41/198                      | 0.122                | 24/124                      | 0.138                |
|                    | deletion      | 34/115                      | <b>0.034</b>         | 26/71                       | <b>0.028</b>         |
| <i>CDK6</i>        | wild type     | 19/53                       | <b>0.002</b>         | 12/32                       | <b>0.001</b>         |
|                    | amplification | 56/260                      | 0.432                | 38/163                      | 0.493                |
| <i>PIK3CA</i>      | wild type     | 20/130                      | 0.632                | 12/66                       | 0.247                |
|                    | mutation      | 1/13                        | 0.601                | 0/8                         | N.A.                 |
| <i>TP53</i>        | wild type     | 10/104                      | 0.160                | 8/56                        | 0.460                |
|                    | mutation      | 11/39                       | 0.227                | 4/18                        | 0.499                |
| <i>MGMT</i>        | unmethylated  | 18/109                      | 0.900                | 14/64                       | 0.745                |
|                    | methylated    | 32/93                       | <b>0.008</b>         | 18/45                       | 0.309                |

Abbreviations: OS, overall survival; PFS, progression-free survival; G-CIMP, Glioma-CpG Island Methylator Phenotype. N.A., not available due to all patients with corresponding mutation expressed high level of *NMI*.

**Supplementary Table S4:** Multivariate Cox regression of *NMI* expression for overall survival and progression-free survival in GBM patients of the TCGA cohort (the Agilent platform)

| Characteristics <sup>a</sup>              | OS             |                 | PFS          |                 |
|-------------------------------------------|----------------|-----------------|--------------|-----------------|
|                                           | <i>P</i>       | HR (95% CI)     | <i>P</i>     | HR (95% CI)     |
| Age ( $\geq 60$ vs. $< 60$ )              | <b>2.08E-4</b> | 2.07(1.41-3.03) | 0.277        |                 |
| <i>MGMT</i> (methylated vs. unmethylated) | 0.429          |                 | <b>0.031</b> | 0.62(0.40-0.96) |
| G-CIMP (positive vs. negative)            | 0.934          |                 | 0.114        |                 |
| Subtype (proneural vs. non-proneural)     | <b>0.036</b>   | 1.69(1.03-2.75) | <b>0.002</b> | 2.66(1.43-4.95) |
| <i>PTEN</i> (deletion vs. wild type)      | 0.323          |                 | 0.423        |                 |
| <i>EGFR</i> (amplification vs. wild type) | 0.152          |                 | 0.232        |                 |
| <i>CDK6</i> (amplification vs. wild type) | 0.110          |                 | 0.106        |                 |
| <i>IDH1</i> (mutation vs. wild type)      | 0.941          |                 | 0.071        |                 |
| <i>NMI</i> expression (high vs. low)      | <b>0.034</b>   | 1.78(1.05-3.04) | <b>0.017</b> | 2.10(1.14-3.86) |

Abbreviations: G-CIMP, Glioma-CpG Island Methylator Phenotype; OS, overall survival; PFS, progression-free survival; HR, hazard ratio; CI, confidence interval.

<sup>a</sup>Tumor origin was not included in Cox regression since almost all the samples were primary GBM for the Agilent data.

**Supplementary Table S5:** Sequences of primers and oligonucleotides used for real-time PCR, plasmid construction and shRNAs

| Primer name                      | sense (5'-3')                                                      | antisense (5'-3')                                                     |
|----------------------------------|--------------------------------------------------------------------|-----------------------------------------------------------------------|
| Primers for real-time PCR        |                                                                    |                                                                       |
| NMI-qPCR                         | CGCGTGGACTATGACAGACA                                               | CAGTAACTCTATGGCAGGTTTGA                                               |
| STAT1-qPCR                       | TTGGCACCTAACGTGCTGT                                                | AGTTCGTACCACTGAGACATCCT                                               |
| GAPDH-qPCR                       | AGCCACATCGCTCAGACAC                                                | GCCCAATACGACCAAATCC                                                   |
| Primers for plasmid construction |                                                                    |                                                                       |
| GFP-NMI                          | CCGCTCGAGATGGAAGCTGATAAAGATGACACAC                                 | CGGGATCCCTATTCTTCAAAGTATGCTATGTGAGGT                                  |
| Flag-NMI                         | GCTCTAGAATGGATTACAAGGATGACGACGATAAGAG<br>ACTCGAGATGGAAGCTGATAAA    | CGGGATCCCTATTCTTCAAAGTATGCTATGTGAGGT                                  |
| pCDH-STAT1-V1                    | CTAGCTAGCGGCAGGATGTCTCAGTGGTACG                                    | CGCGGATCCGAAAAGTGTGCGCCAGAGAAGATGA                                    |
| pCDH-STAT1-V2                    | CTAGCTAGCGGCAGGATGTCTCAGTGGTACG                                    | CGCGGATCCGAGGTTTGTAAACATGTCACTCTTCTG                                  |
| mCherry-STAT1-V1                 | GGAAGATCTGGAGGTGGAGGTATGTCTCAGTGGTACG                              | CGGGGTACCGAAAAGTGTGCGCCAGAGAAGATGA                                    |
| mCherry-STAT1-V2                 | GGAAGATCTGGAGGTGGAGGTATGTCTCAGTGGTACG                              | CGGGGTACCGAGGTTTGTAAACATGTCACTCTTCTG                                  |
| Oligonucleotides for shRNAs      |                                                                    |                                                                       |
| shLacZ                           | TGTTCAAGAGATTTAATCAGCGACTGATCCTTTTTTCG<br>ATCAGTCGCTGATTTAAA       | TCGAGAAAAAAGGATCAGTCGCTGATTAAATCTCTT<br>GAATTTAATCAGCGACTGATCCA       |
| shNMI-1                          | TGCCAAGCCAGTTCCATTAAATTTCAAGAGAATTTAAT<br>GGAAGTGGCTTGGCTTTTTTC    | TCGAGAAAAAAGCCAAGCCAGTTCCATTAAATCTC<br>TTGAAATTTAATGGAAGTGGCTTGGCA    |
| shNMI-2                          | TGTTAACCCGGATTACTGTAAATTTCAAGAGAATTTAC<br>AGTAATCCGGGTAACTTTTTTC   | TCGAGAAAAAAGTTAACCCGGATTACTGTAAATCT<br>CTTGAAATTTACAGTAATCCGGGTAAACA  |
| shSTAT1-1                        | TGCCCTGAAGTATCTGTATCCAATTTCAAGAGATTGGAT<br>ACAGATACTTCAGGGCTTTTTTC | TCGAGAAAAAAGCCCTGAAGTATCTGTATCCAATCT<br>CTTGAATTGGATACAGATACTTCAGGGCA |
| shSTAT1-2                        | TGCTGGAAGATTTACAAGATGAATTTCAAGAGATTCATC<br>TTGTAAATCTTCCAGCTTTTTTC | TCGAGAAAAAAGCTGGAAGATTTACAAGATGAATC<br>TCTTGAATTCATCTTGTAAATCTTCCAGCA |
